# Supplementary material
Source: HighWire-hosted journal article supplement (https://www.jneurosci.org/highwire/filestream/600493/field_highwire_adjunct_files/0/Supplemental_Figure.pdf)
Supplement: Supplemental_Figure.pdf [file Supplemental_Figure.pdf]

## Supplemental Material

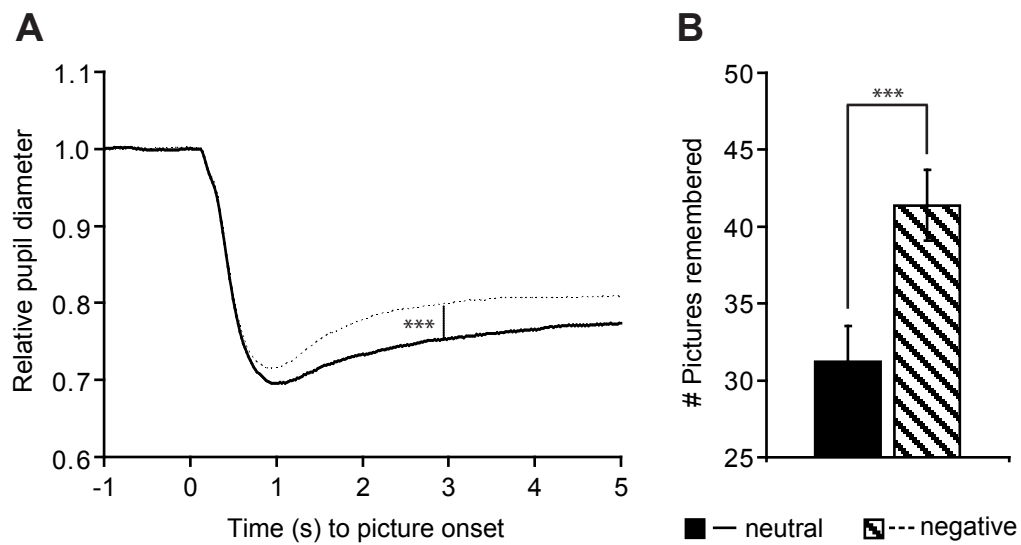

**Supplemental Figure S1.** Picture valence effects. **A**, Mean phasic pupil dilation (expressed as ratio of baseline diameter) after the initial light reflex was larger during the encoding of negatively arousing than neutral pictures. **B**, Cued recall memory was better for negative than for neutral pictures

\*\*\*:  $p < 0.001$
